# Supplementary material
Source: PubMed Central journal article supplement (PMC9593962)
Supplement: NIHMS1843202-supplement-supplemental_material.pdf [file NIHMS1843202-supplement-supplemental_material.pdf]

## SUPPORTING INFORMATION

Toward Reducing hERG Affinities for DAT Inhibitors with a Combined Machine Learning and Molecular Modelling Approach

Kuo Hao Lee<sup>1,#</sup>, Andrew D. Fant<sup>1,#</sup>, Jiqing Guo<sup>2</sup>, Andy Guan<sup>1</sup>, Joslyn Jung<sup>1</sup>, Mary

Kudaibergenova<sup>3</sup>, Williams E. Miranda<sup>3</sup>, Therese Ku<sup>4</sup>, Jianjing Cao<sup>4</sup>, Soren Wacker<sup>2,3,5</sup>, Henry J.

Duff<sup>2</sup>, Amy Hauck Newman<sup>4</sup>, Sergei Y. Noskov<sup>3</sup>, Lei Shi<sup>1,\*</sup>

<sup>1</sup>Computational Chemistry and Molecular Biophysics Section, Molecular Targets and Medications Discovery Branch, National Institute on Drug Abuse – Intramural Research Program, National Institutes of Health, Baltimore, MD 21224, USA

<sup>2</sup>Libin Cardiovascular Institute of Alberta, Cumming School of Medicine, University of Calgary, Calgary, AB T2N 4N1, Canada

<sup>3</sup>Centre for Molecular Simulation, Department of Biological Sciences, University of Calgary, Calgary, AB T2N 1N4, Canada

<sup>4</sup>Medicinal Chemistry Section, Molecular Targets and Medications Discovery Branch, National Institute on Drug Abuse – Intramural Research Program, National Institutes of Health, Baltimore, MD 21224, USA

<sup>5</sup>Achlys Inc., 7-126 Li Ka Shing Center for Health and Innovation, Edmonton, AB T6G 2E1, Canada

#contributed equally

\*corresponding author: [lei.shi2@nih.gov](mailto:lei.shi2@nih.gov)

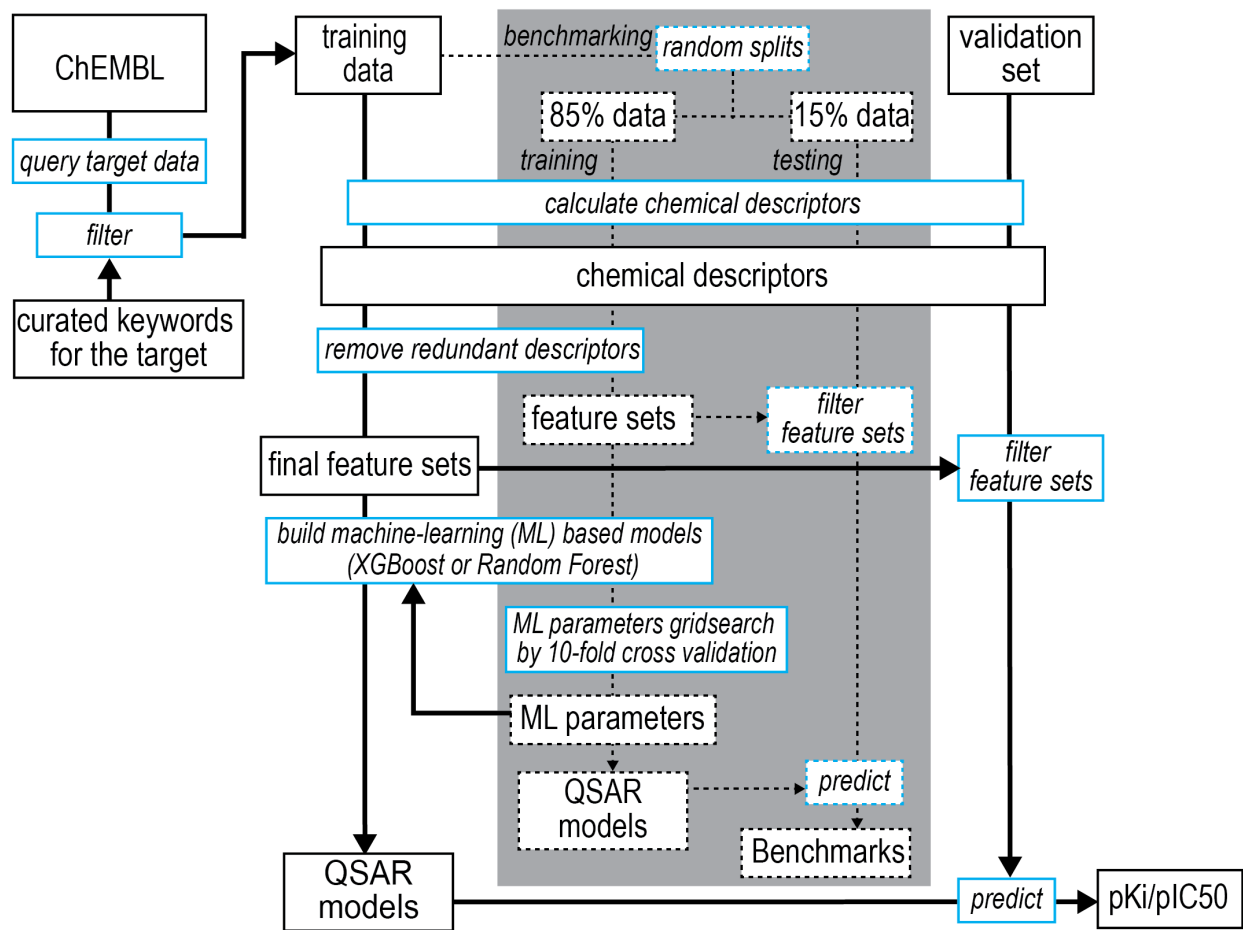

Figure S1. The workflow of building the machine learning-based QSAR models and using them to make predictions. Black boxes indicate data, blue boxes denote operations.

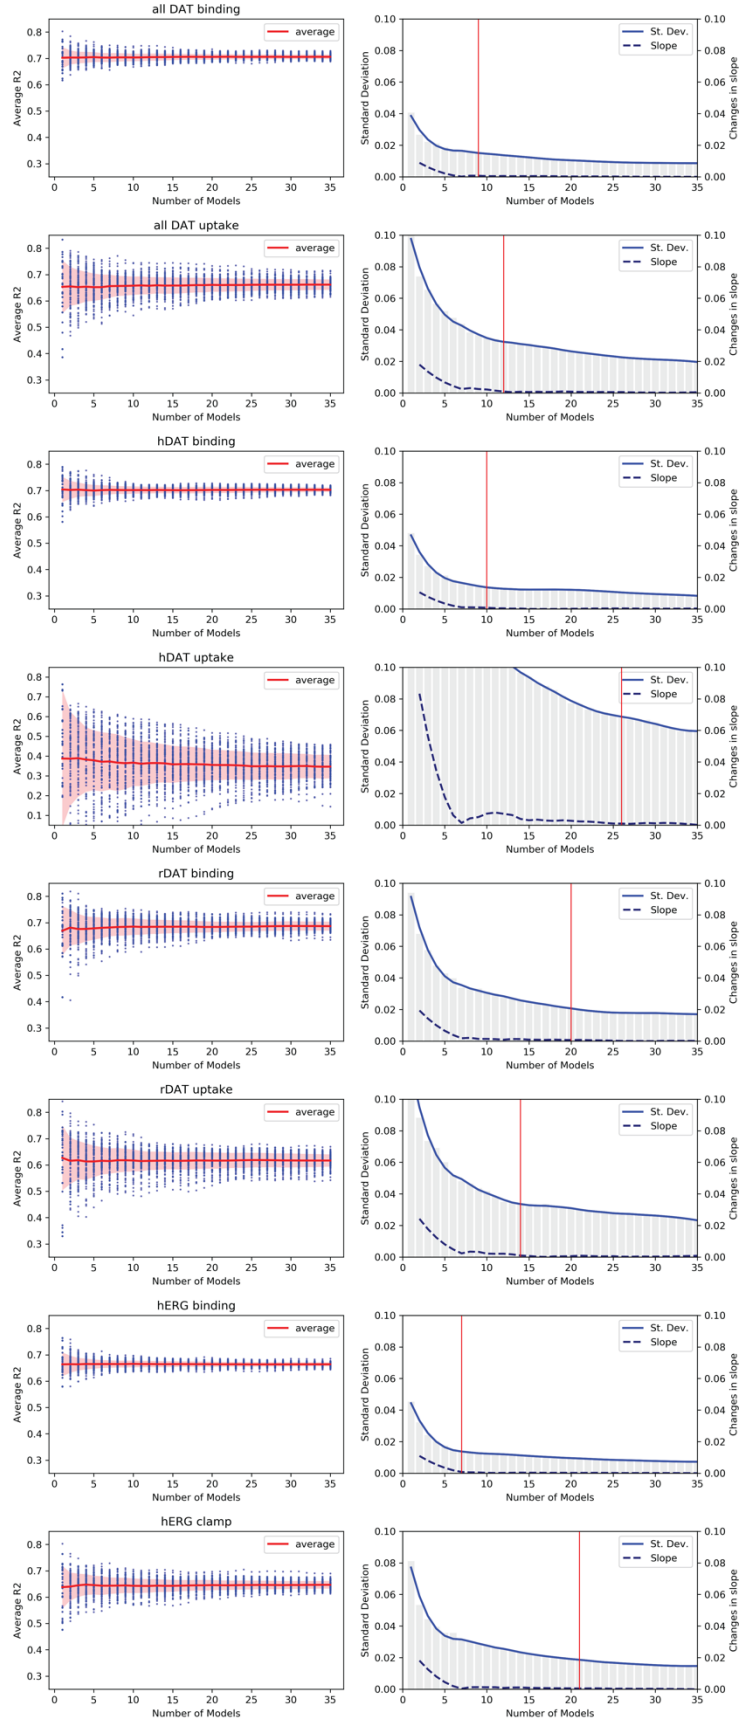

Figure S2. The number of models needed for each set of XGBoost regression models. For each set of models, we randomly select certain number ( $n=1, \dots, 35$ ) of models by a bootstrapping sampling with 100 repeats, and calculated the averages (red curves) and standard deviations (pink areas) of  $R^2$  values for  $n$  models. On the right panels, slope is the change of the standard deviations of  $R^2$  shown on the corresponding left panels for each number of models. The number of models for each dataset that starts to have the slope  $<0.001$  was indicated by red bar, which we define as the converging number of models.

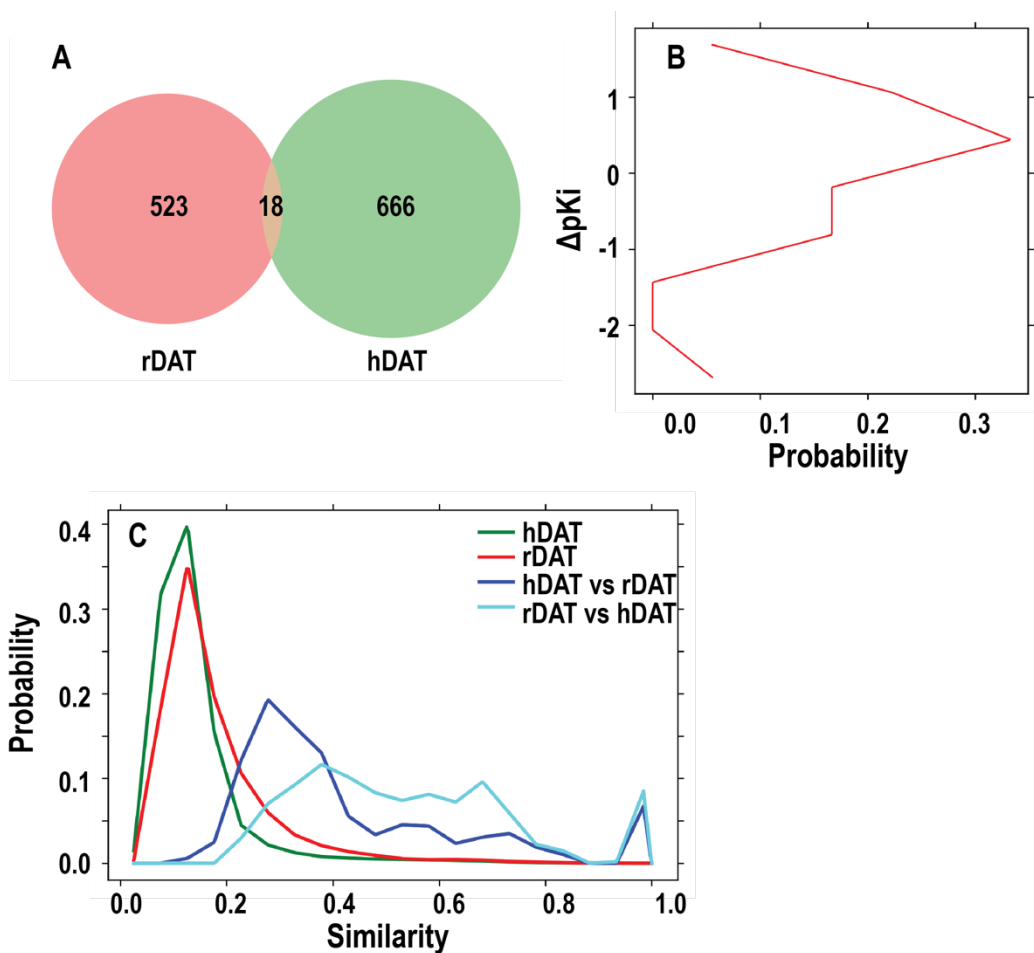

Figure S3. Comparison of the rDAT and hDAT binding datasets. (A) rDAT and hDAT binding datasets have 18 overlapping molecules. (B) Distribution of  $\Delta pK_i$  of 18 molecules. The  $\Delta pK_i$  was calculated using  $pK_{i,rDAT} - pK_{i,hDAT}$ . (C) Distribution of pairwise similarity. The Tanimoto similarity was calculated based on the Morgan fingerprint of each molecule.

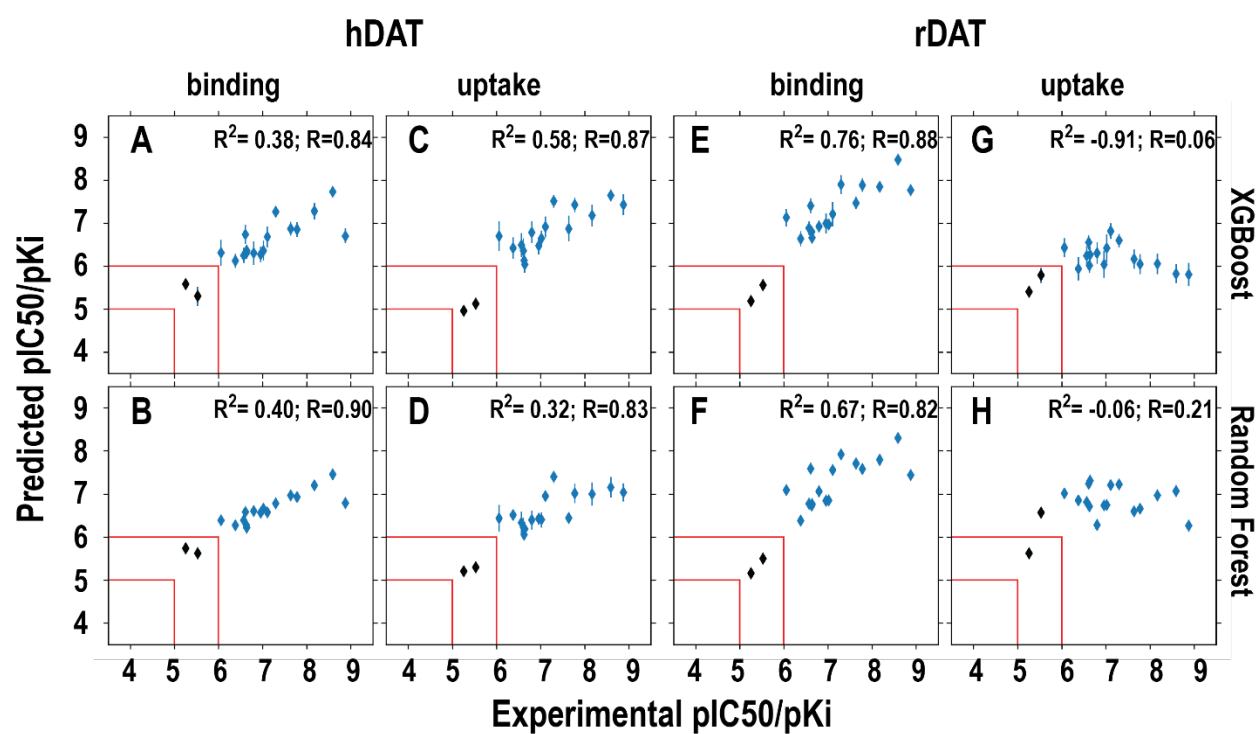

Figure S4. Correlations between the predicted and experimentally measured hDAT and rDAT affinities. See Figure 3 for the color scheme.

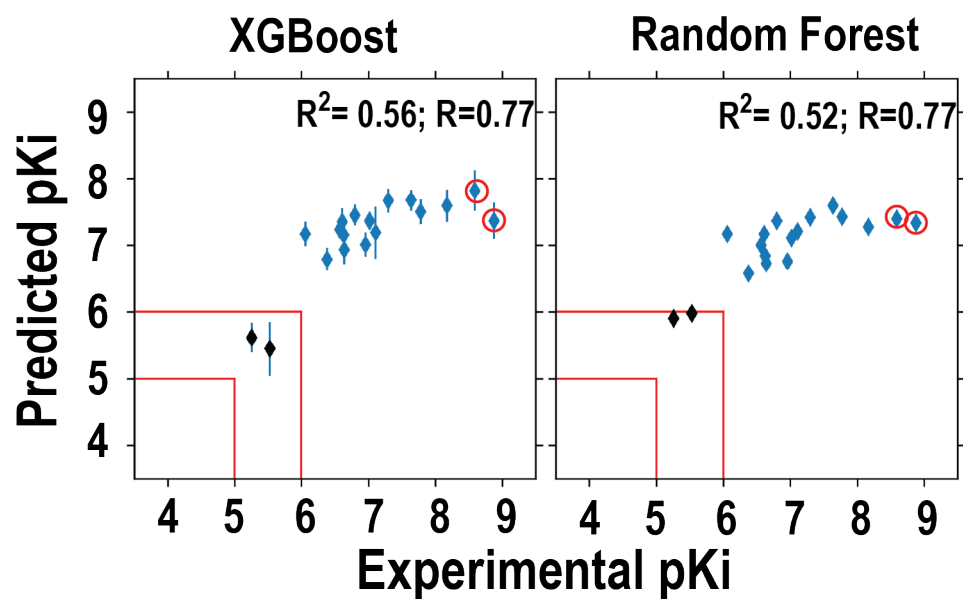

Figure S5. Correlations between the predicted and experimentally measured DAT affinities using models built with the in-house DAT dataset. When removing the two high affinity points ( $pK_i \geq 8.5$ , highlighted with red circles), the R values increase to 0.84 for the predictions with the XGBoost models and 0.82 for those with the RF models.

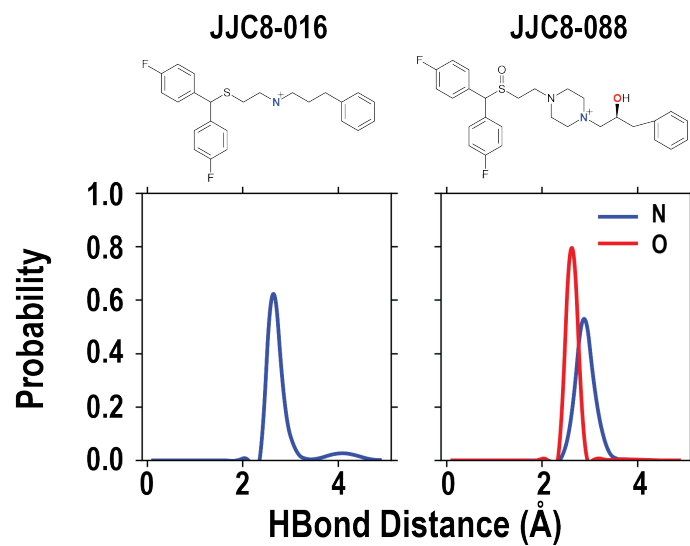

Figure S6. MD simulations of hDAT show that the nitrogen atom on JJC8-016 can form one H-bond with Asp79, while the protonated nitrogen and the hydroxy group of JJC8-088 can form two stable H-bonds with Asp79. The blue and red represent the H-bond interaction from the nitrogen and oxygen atoms on the ligand.



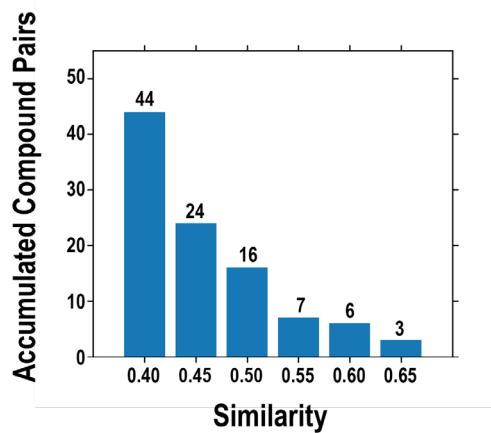

Figure S7. The compound pairs found in the ChEMBL datasets showing opposite affinity trends at hERG and DAT. We use the criteria of one compound is >90 fold better in DAT, and the other compound is >2 fold better in hERG. The accumulation of the numbers of compound pairs with Tanimoto similarity cutoff is reported in the bar plot.

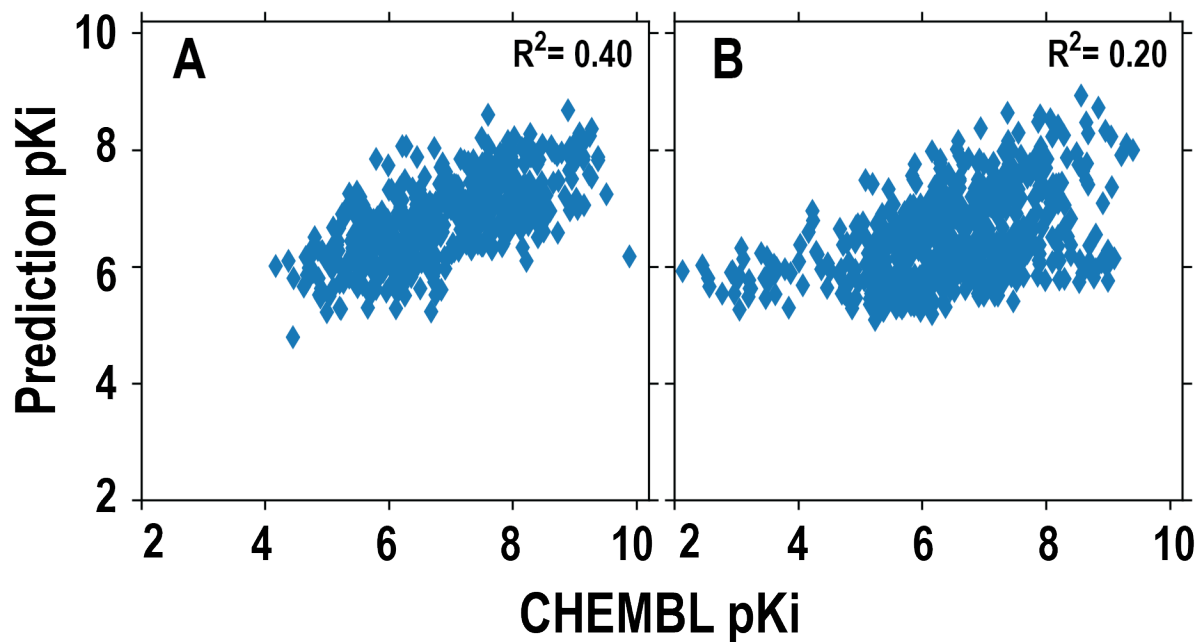

Figure S8. Cross predictions between hDAT and rDAT binding XGBoost models. (A) Predictions of the hDAT binding models on the rDAT binding dataset. (B) Predictions of the rDAT binding models on the hDAT binding dataset.

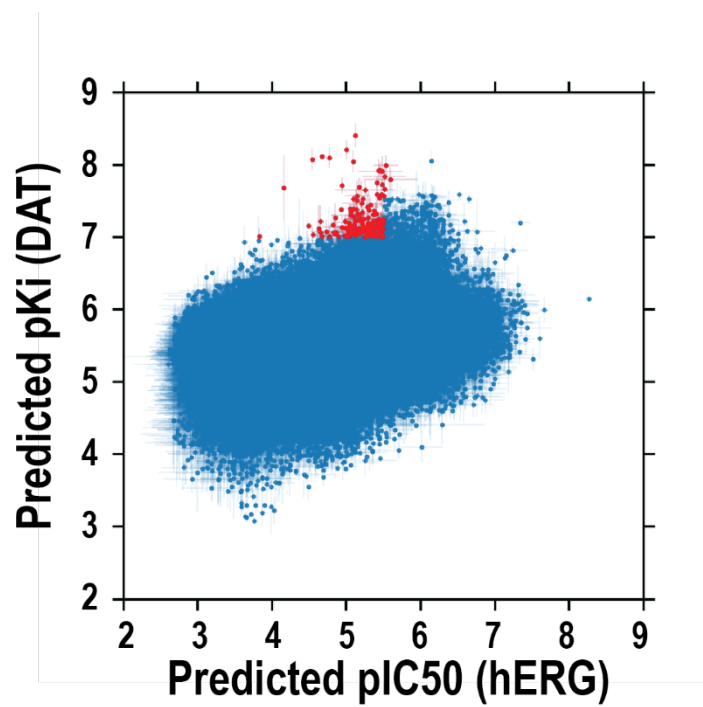

Figure S9. Counter screening of the NCI open database compounds. The hERG clamp models and all-DAT binding models are used for the prediction, with the training data including both the ChEMBL and the validation datasets.

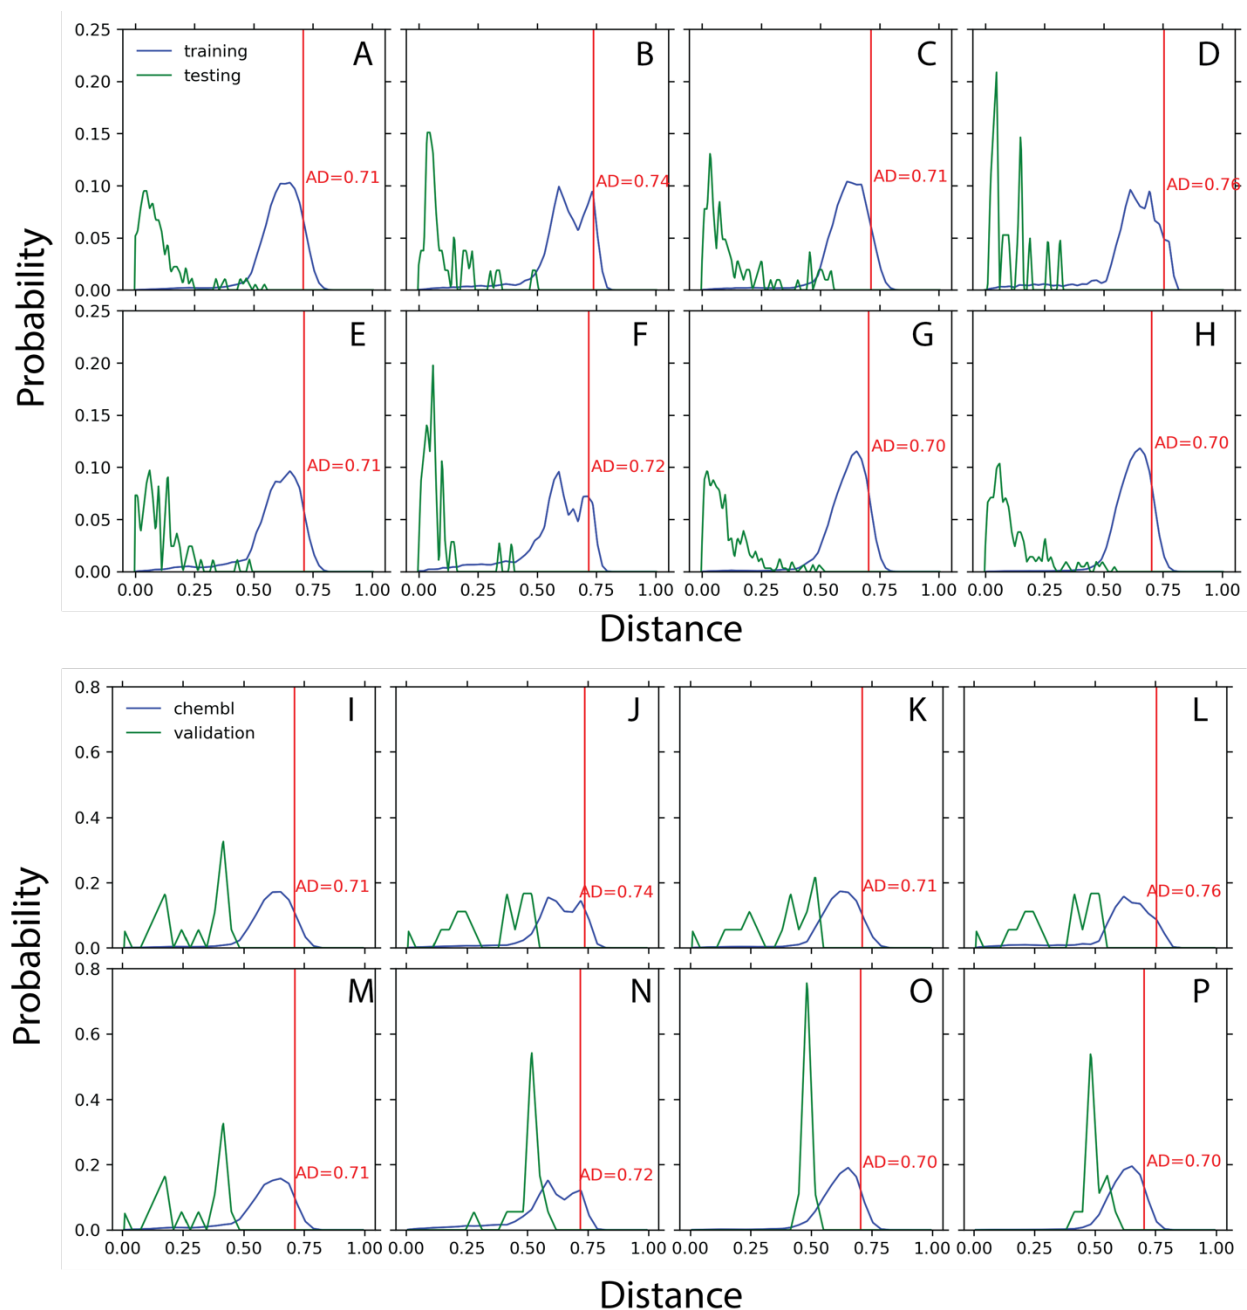

Figure S10. The testing and validation datasets are covered by the applicability domains of the QSAR models built from different datasets. For the models used in the benchmarking, examples of using one random splitting show that the testing datasets are covered by the applicability domains of corresponding training datasets for the (A) all-DAT binding, (B) all-DAT uptake, (C) hDAT binding, (D) hDAT uptake, (E) rDAT binding, (F) rDAT uptake, (G) hERG binding and (H) hERG clamp. The validation dataset is also covered by the applicability domains of the datasets used to build the final models: (I) all-DAT binding, (J) all-DAT uptake, (K) hDAT binding, (L) hDAT uptake, (M) rDAT binding, (N) rDAT uptake, (O) hERG binding and (P) hERG clamp.

Table S1. The filters and the numbers of datapoints after applying each filter.

|                                        | hERG    |      | all-DAT |      |         |      | hDAT   |      |         |     | rDAT   |     |         |     |        |     |
|----------------------------------------|---------|------|---------|------|---------|------|--------|------|---------|-----|--------|-----|---------|-----|--------|-----|
| Starting data                          | 20695   |      | 13273   |      |         |      | 7138   |      |         |     | 5909   |     |         |     |        |     |
| After confidence score filter          | 20056   |      | 8392    |      |         |      | 5832   |      |         |     | 2442   |     |         |     |        |     |
| After assay type filter                | 19330   |      | 8369    |      |         |      | 5809   |      |         |     | 2442   |     |         |     |        |     |
|                                        | hERG    |      | Ki      |      | IC50    |      | Ki     |      | IC50    |     | Ki     |     | IC50    |     | Ki     |     |
| After Ki / IC50 filter                 | 10454   | 2466 | 3432    | 3418 | 2506    | 2316 | 887    | 1087 |         |     |        |     |         |     |        |     |
| After standard units filter            | 8957    | 1546 | 2671    | 2659 | 1745    | 1557 | 887    | 1087 |         |     |        |     |         |     |        |     |
| After activity relationship type fixes | 6685    | 1206 | 2253    | 2368 | 1381    | 1323 | 833    | 1030 |         |     |        |     |         |     |        |     |
|                                        | hERG    |      |         |      | all-DAT |      |        |      | hDAT    |     |        |     | rDAT    |     |        |     |
|                                        | binding |      | clamp   |      | binding |      | uptake |      | binding |     | uptake |     | binding |     | uptake |     |
|                                        | IC50    | Ki   | IC50    | Ki   | IC50    | Ki   | IC50   | Ki   | IC50    | Ki  | IC50   | Ki  | IC50    | Ki  | IC50   | Ki  |
| After assay description filter         | 2456    | 730  | 2021    | 52   | 845     | 1616 | 822    | 484  | 383     | 935 | 597    | 156 | 442     | 666 | 218    | 328 |
| Reserving hERG calibration compounds   | n/a     | n/a  | 1968    | 49   | n/a     | n/a  | n/a    | n/a  | n/a     | n/a | n/a    | n/a | n/a     | n/a | n/a    | n/a |
| After data set size filter             | 2337    | 678  | 1542    | 44   | 807     | 1561 | 784    | 481  | 353     | 895 | 564    | 153 | 434     | 649 | 204    | 328 |
| Desalting pass                         | 2337    | 678  | 1542    | 44   | 805     | 1559 | 784    | 480  | 351     | 893 | 564    | 152 | 434     | 649 | 204    | 328 |
| After oddball element filter           | 2337    | 678  | 1542    | 44   | 805     | 1559 | 784    | 480  | 351     | 893 | 564    | 152 | 434     | 649 | 204    | 328 |
| After molecular weight filter          | 2317    | 667  | 1519    | 44   | 793     | 1540 | 767    | 477  | 339     | 874 | 560    | 149 | 434     | 649 | 191    | 328 |
| After pChEMBL value filter             | 2317    | 667  | 1519    | 44   | 793     | 1540 | 767    | 477  | 339     | 874 | 560    | 149 | 434     | 649 | 191    | 328 |
| After edge case filter                 | 2317    | 667  | 1519    | 44   | 793     | 1540 | 767    | 477  | 339     | 874 | 560    | 149 | 434     | 649 | 191    | 328 |
| After deduplication pass               | 2043    | 634  | 1405    | 44   | 538     | 1189 | 554    | 350  | 279     | 684 | 414    | 126 | 260     | 541 | 140    | 229 |
| Excluding 5-6 pKi/pIC50                | 1137    | 334  | 783     | 42   | 434     | 887  | 383    | 219  | 213     | 503 | 277    | 45  | 222     | 424 | 110    | 177 |
| Binders                                | 549     | 251  | 284     | 41   | 417     | 798  | 294    | 200  | 199     | 438 | 234    | 38  | 219     | 401 | 64     | 165 |
| Nonbinders                             | 588     | 83   | 499     | 1    | 17      | 89   | 89     | 19   | 14      | 65  | 43     | 7   | 3       | 23  | 46     | 12  |

Table S2. Keywords used in assay description filter to divide the data into hERG binding, hERG clamp, DAT binding, and DAT uptake datasets.

| Dataset                                                                 | Description keyword                                                                                                                                  |
|-------------------------------------------------------------------------|------------------------------------------------------------------------------------------------------------------------------------------------------|
| hERG binding                                                            | [3H] Astemizole                                                                                                                                      |
|                                                                         | [3H]astemizole                                                                                                                                       |
|                                                                         | [3H]-astemizole                                                                                                                                      |
|                                                                         | [3H] astemizole                                                                                                                                      |
|                                                                         | [3H]Astemizole                                                                                                                                       |
|                                                                         | radiolabeled astemizole                                                                                                                              |
|                                                                         | [3H]bufuralol                                                                                                                                        |
|                                                                         | [3H]Dofetilide                                                                                                                                       |
|                                                                         | [3H] dofetilide                                                                                                                                      |
|                                                                         | [3H]dofetilide                                                                                                                                       |
|                                                                         | 3H-dofetilide                                                                                                                                        |
|                                                                         | [3H]-dofetilide                                                                                                                                      |
|                                                                         | [3H]-Dofetilide                                                                                                                                      |
|                                                                         | radiolabeled dofetilide                                                                                                                              |
|                                                                         | Displacement of dofetilide                                                                                                                           |
|                                                                         | Displacement of labeled dofetilide                                                                                                                   |
|                                                                         | Inhibition of dofetilide binding                                                                                                                     |
|                                                                         | [3H]dofetidile                                                                                                                                       |
|                                                                         | Displacement of doferilide                                                                                                                           |
|                                                                         | Cy3b-Dofetilide-based                                                                                                                                |
|                                                                         | [35S]MK-499                                                                                                                                          |
|                                                                         | [35S]MK499                                                                                                                                           |
|                                                                         | [35S]-MK-499                                                                                                                                         |
|                                                                         | 35[S] MK-499                                                                                                                                         |
|                                                                         | MK499                                                                                                                                                |
|                                                                         | Displacement of MK-499                                                                                                                               |
|                                                                         | radiolabeled MK-499                                                                                                                                  |
|                                                                         | radio-labeled MK-499                                                                                                                                 |
|                                                                         | MK-0499                                                                                                                                              |
|                                                                         | [35S]N-[(4R)-1'-[(2R)-6-cyano-1,2,3,4-tetrahydro-2-naphthalenyl]-3,4-dihydro-4-hydroxy Spiro[2H-1-benzopyran-2,4'-piperidin]-6-yl]methanesulfonamide |
|                                                                         | [35S]N-[(4R)-10-[(2R)-6-cyano-1,2,3,4-tetrahydro-2-naphthyl]-3,4-dihydro-4-hydroxy Spiro[2H-1-benzopyran-2,40-piperidin]-6-yl]methanesulfonamide     |
|                                                                         | [35S]N-[(4R)-1'-[(2R)-6-cyano-1,2,3,4-tetrahydro-2-naphthyl]-3,4-dihydro-4-hydroxy Spiro[2H-1-benzopyran-2,4'-piperidin]6-yl]methanesulfonamide      |
|                                                                         | 3,7-Bis[2-(4-nitro[3,5-3H]phenyl)ethyl]-3,7-diazabicyclo[3.3.1]nonane                                                                                |
| 3,7-Bis[2-(4-nitro[3,5]-[3H]phenyl)ethyl]-3,7-diazabicyclo[3.3.1]nonane |                                                                                                                                                      |
| radioligand displacement                                                |                                                                                                                                                      |
| radioligand binding assay                                               |                                                                                                                                                      |
| radioligand-binding competition                                         |                                                                                                                                                      |
| Inhibition of binding to hERG                                           |                                                                                                                                                      |
| Displacement of dofetilide                                              |                                                                                                                                                      |
| Inhibition of Cy3B-labeled ligand binding                               |                                                                                                                                                      |
| Displacement of Tracer Red                                              |                                                                                                                                                      |

| Dataset     | Description keyword                                                                                                                                                                                                                                                                                                                                                                                                                                                                              |
|-------------|--------------------------------------------------------------------------------------------------------------------------------------------------------------------------------------------------------------------------------------------------------------------------------------------------------------------------------------------------------------------------------------------------------------------------------------------------------------------------------------------------|
| hERG clamp  | manual electrophysiology<br>electrophysiology assay<br>electrophysiological assay<br>electrophysiology study<br>whole-cell plate-based electrophysiology<br>patch plate method<br>clamp<br>PatchXpress<br>Q-patch<br>Qpatch<br>patch express assay<br>ion works assay<br>IONWORKS<br>IonWorks<br>ionworks HT assay                                                                                                                                                                               |
| DAT binding | BCTP<br>[3H]BTCP<br>radiolabeled BTCP<br>CIT<br>mazindol<br>Mazindol<br>Vanoxerine<br>[125I]PE2I<br>IPT<br>[125I]N-(3'-iodopropen-2'yl)-2-beta-carbomethoxy-3-beta-(4-chlorophenyl)tropane<br>CFT<br>WIN-<br>WIN-35<br>WIN35428<br>WIN5428<br>WIN 35428<br>WIN 35,428<br>WIN-35428<br>WIN-35,428<br>WIN35,428<br>[125I]methyl 3-(4-iodophenyl)-8-methyl-8-aza-bicyclo[3.2.1]octane-2-carboxylate<br>GBR<br>GBR12935<br>GBR-12935<br>GBR-12,935<br>RT155<br>RTI55<br>RTI -55<br>RTI-55<br>RTI-121 |
| DAT uptake  | [3H]dopamine reuptake<br>[3H]-dopamine<br>[3H]dopamine<br>[3H]DA<br>[3H]-DA<br>Inhibition of dopamine (DA) uptake                                                                                                                                                                                                                                                                                                                                                                                |

Table S3. Benchmarks of the models trained with the in-house DAT binding dataset.

| Models         | Metrics        | XGBoost |         |      | Random Forest |         |      |
|----------------|----------------|---------|---------|------|---------------|---------|------|
|                |                | Ave.    | St.Dev. | Best | Ave.          | St.Dev. | Best |
| Regression     | R <sup>2</sup> | 0.48    | 0.13    | 0.71 | 0.46          | 0.15    | 0.67 |
|                | RMSE           | 0.61    | 0.09    | --   | 0.63          | 0.10    | --   |
| Classification | Accuracy       | 0.97    | 0.02    | --   | 0.98          | 0.02    | --   |
|                | Sensitivity    | 0.99    | 0.01    | --   | 1.00          | 0.01    | --   |
|                | Specificity    | 0.00    | 0.00    | --   | 0.20          | 0.41    | --   |
|                | F Score        | 0.98    | 0.01    | --   | 0.99          | 0.01    | --   |

Ave., averages of 35 models for each dataset for the regression modeling, or 25 models for each dataset for the classification modeling (see Methods and Figure S2); S.D., standard deviation.



Table S4. Benchmarks of the XGBoost classification models trained with equal numbers of binders and non-binders from the all-DAT binding dataset. We randomly reduced the number of binders to match number of nonbinders, and the randomization was performed 9 times to prepare 9 different training datasets. For each dataset, models were built using 25 different random splittings. The averages and standard deviations of the benchmarks were then calculated for the resulting 225 models. Compared to Table 2, the accuracy is not as good as using the entire dataset, but the sensitivity and specificity are improved.

|                    | <b>Ave.</b> | <b>St. Dev.</b> |
|--------------------|-------------|-----------------|
| <b>Accuracy</b>    | 0.87        | 0.07            |
| <b>Sensitivity</b> | 0.88        | 0.09            |
| <b>Specificity</b> | 0.87        | 0.09            |
| <b>F Score</b>     | 0.86        | 0.07            |

Table S5. Most correlated descriptors for DAT and hERG ligands.

| Dataset         | 10 most positively correlated features |      | 10 most negatively correlated features |       |
|-----------------|----------------------------------------|------|----------------------------------------|-------|
|                 | Descriptor                             | R    | Descriptor                             | R     |
| DAT binding     | NumAliphaticHeterocycles               | 0.50 | BalabanJ                               | -0.41 |
|                 | NumSaturatedHeterocycles               | 0.49 | SlogP_VSA11                            | -0.27 |
|                 | Chi3n                                  | 0.44 | SlogP_VSA1                             | -0.23 |
|                 | Chi4n                                  | 0.44 | qed                                    | -0.21 |
|                 | Chi3v                                  | 0.43 | fr_allylic_oxid                        | -0.21 |
|                 | Chi4v                                  | 0.42 | SMR_VSA9                               | -0.21 |
|                 | RingCount                              | 0.41 | TPSA                                   | -0.18 |
|                 | NumSaturatedRings                      | 0.40 | NHOHCount                              | -0.18 |
|                 | Chi2n                                  | 0.39 | fr_NH2                                 | -0.17 |
|                 | Chi2v                                  | 0.39 | PEOE_VSA1                              | -0.17 |
| hERG clamp      | fr_unbrch_alkane                       | 0.34 | fr_COO                                 | -0.34 |
|                 | MolLogP                                | 0.30 | fr_COO2                                | -0.34 |
|                 | EState_VSA5                            | 0.21 | TPSA                                   | -0.33 |
|                 | MinAbsEStateIndex                      | 0.20 | fr_Ar_COO                              | -0.33 |
|                 | VSA_EState5                            | 0.19 | VSA_EState2                            | -0.28 |
|                 | PEOE_VSA7                              | 0.18 | NumHDonors                             | -0.26 |
|                 | EState_VSA8                            | 0.18 | NOCCount                               | -0.25 |
|                 | fr_sulfide                             | 0.18 | fr_C_O                                 | -0.25 |
|                 | NumRotatableBonds                      | 0.16 | NHOHCount                              | -0.23 |
|                 | PEOE_VSA6                              | 0.16 | PEOE_VSA2                              | -0.23 |
| DAT validation  | RingCount                              | 0.86 | BalabanJ                               | -0.80 |
|                 | Kappa2                                 | 0.84 | qed                                    | -0.79 |
|                 | NumRotatableBonds                      | 0.83 | fr_priamide                            | -0.61 |
|                 | Chi1                                   | 0.83 | NHOHCount                              | -0.61 |
|                 | MolMR                                  | 0.82 | PEOE_VSA12                             | -0.61 |
|                 | Chi1n                                  | 0.82 | fr_NH2                                 | -0.61 |
|                 | LabuteASA                              | 0.82 | SMR_VSA4                               | -0.61 |
|                 | Kappa3                                 | 0.81 | fr_amide                               | -0.49 |
|                 | HeavyAtomCount                         | 0.81 | fr_C_O_noCOO                           | -0.49 |
|                 | Chi3n                                  | 0.80 | fr_C_O                                 | -0.49 |
| hERG validation | NumRotatableBonds                      | 0.87 | qed                                    | -0.88 |
|                 | MolLogP                                | 0.81 | BalabanJ                               | -0.81 |
|                 | Kappa2                                 | 0.79 | SMR_VSA4                               | -0.70 |

|                        |      |                  |       |
|------------------------|------|------------------|-------|
| Kappa3                 | 0.76 | fr_priamide      | -0.70 |
| RingCount              | 0.76 | NHOHCount        | -0.70 |
| Chi1                   | 0.74 | fr_NH2           | -0.70 |
| NumAromaticCarbocycles | 0.73 | PEOE_VSA12       | -0.70 |
| fr_benzene             | 0.73 | TPSA             | -0.69 |
| NumAromaticRings       | 0.73 | FpDensityMorgan1 | -0.61 |
| Chi1n                  | 0.72 | VSA_EState2      | -0.58 |

---

Table S6. Summary of MD simulations.

| Protein | Ligand  | Number of runs | Simulation length |
|---------|---------|----------------|-------------------|
| DAT     | JJC8016 | 7              | 15.5 $\mu$ s      |
|         | JJC8088 | 5              | 11.1 $\mu$ s      |
| hERG    | JJC8016 | 6              | 4.86 $\mu$ s      |
|         | JJC8088 | 3              | 3.6 $\mu$ s       |
